# Supplementary material
Source: publisher figshare collection journal article supplement (https://karger.figshare.com/ndownloader/files/15520229)
Supplement: Supplementary file 1 [file 15520229]

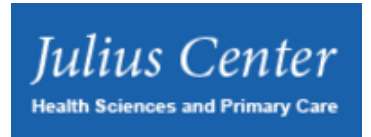

\_\_\_\_\_

\_\_\_\_\_

\_\_\_\_\_

\_\_\_\_\_

\_\_\_\_\_

## History taking

### Cardiovascular risk factors

- Height:    cm
- Weight:    kg
- Smoking: ☐ Current smoker ☐ Ex-smoker (quitted >6mnth ago) ☐ Never smoked
- If current/ever; years:   sig. p/d:
- Alcohol use   units per week

## Family history

First-degree relatives < 65 yr with myocardial infarction/ischemic stroke/peripheral artery disease?

- 0  
1  
2

### Medication

Current medication, i.e. *before* the event suspected of a TIA:

Name:

Dose:

☐ NONE[illegible]

## Patient's narrative of signs and symptoms

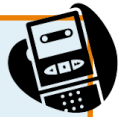

'Can you describe in your own words the symptoms for which you consulted the GP?'

--- The response to (only) this question will be recorded ---

### Course of symptoms

- The start of symptoms was:  
☐ sudden  
☐ gradually
- Total duration of symptoms:   h   min
- Did the participant feel the symptoms coming or did they come unexpectedly?  
☐ He/she felt symptoms coming  
☐ Symptoms came unexpectedly
- Were there any signs or symptoms preceding the (possible) neurological deficits?  
☐ No  
☐ Yes, namely: \_\_\_\_\_  
\_\_\_\_\_  
\_\_\_\_\_  
\_\_\_\_\_
- Were symptoms immediately there in full intensity or did they get worse over time?  
☐ Onset of symptoms in full intensity  
☐ Symptoms got worse over time
- Does the participant fully remember the signs and symptoms?  
☐ YES ☐ NO
- Had the participant experienced the symptoms (suspected of a TIA) before?  
☐ YES ☐ NO  
If yes, when? \_\_\_\_\_  
\_\_\_\_\_  
\_\_\_\_\_
- How many times?

***Were the following signs and symptoms present?***

|                                                                                                                                                                                                                                                                                                                                                           |                                                                                                                                                                                        |
|-----------------------------------------------------------------------------------------------------------------------------------------------------------------------------------------------------------------------------------------------------------------------------------------------------------------------------------------------------------|----------------------------------------------------------------------------------------------------------------------------------------------------------------------------------------|
| <p>Total or partial loss of strength (motor deficit) in arm/hand, leg/foot or face</p> <p style="text-align: right;">If yes: Unilateral<br/>Bilateral</p>                                                                                                                                                                                                 | <p><input type="checkbox"/> Yes <input type="checkbox"/> No</p> <p><input type="checkbox"/><br/><input type="checkbox"/></p>                                                           |
| <p>Numbness/tingling sensation (sensory deficit) in arm/hand, leg/foot, or face</p> <p style="text-align: right;">If yes: Unilateral<br/>Bilateral</p>                                                                                                                                                                                                    | <p><input type="checkbox"/> Yes <input type="checkbox"/> No</p> <p><input type="checkbox"/><br/><input type="checkbox"/></p>                                                           |
| <p>Vision problem/impaired vision</p> <p>If yes; this concerned:</p> <ul style="list-style-type: none"> <li>• Diplopia</li> <li>• Blurred vision (both eyes)</li> <li>• Loss of vision/blindness in one part of visual field (both eyes)</li> <li>• Loss of vision/blindness in one eye (amaurosis fugax); as a shade coming down over the eye</li> </ul> | <p><input type="checkbox"/> Yes <input type="checkbox"/> No</p> <p><input type="checkbox"/><br/><input type="checkbox"/><br/><input type="checkbox"/><br/><input type="checkbox"/></p> |
| <p>Seeing flashes, sparkles, stars or other visual phenomena</p>                                                                                                                                                                                                                                                                                          | <p><input type="checkbox"/> Yes <input type="checkbox"/> No</p>                                                                                                                        |
| <p>Communication problem</p> <p>If yes; this concerned:</p> <ul style="list-style-type: none"> <li>• Incoherent language, trouble finding words, strange sentences or words, trouble understanding language (dysphasia)</li> <li>• Problems with articulation and pronouncing words (dysarthria)</li> </ul>                                               | <p><input type="checkbox"/> Yes <input type="checkbox"/> No</p> <p><input type="checkbox"/><br/><input type="checkbox"/></p>                                                           |
| <p>Spinning sensation/true vertigo</p>                                                                                                                                                                                                                                                                                                                    | <p><input type="checkbox"/> Yes <input type="checkbox"/> No</p>                                                                                                                        |
| <p>Lightheadedness</p>                                                                                                                                                                                                                                                                                                                                    | <p><input type="checkbox"/> Yes <input type="checkbox"/> No</p>                                                                                                                        |
| <p>Feeling like one might black-out/faint (presyncope)</p>                                                                                                                                                                                                                                                                                                | <p><input type="checkbox"/> Yes <input type="checkbox"/> No</p>                                                                                                                        |
| <p>Loss of consciousness</p>                                                                                                                                                                                                                                                                                                                              | <p><input type="checkbox"/> Yes <input type="checkbox"/> No</p>                                                                                                                        |
| <p>Loss of short-term memory, without loss of consciousness</p>                                                                                                                                                                                                                                                                                           | <p><input type="checkbox"/> Yes <input type="checkbox"/> No</p>                                                                                                                        |
| <p>Being adrift, unsteady gait, disturbed coordination (ataxia)</p>                                                                                                                                                                                                                                                                                       | <p><input type="checkbox"/> Yes <input type="checkbox"/> No</p>                                                                                                                        |
| <p>Swallowing problem/choking</p> <p>Needs to be distinguished from:<br/>Globus sensation</p>                                                                                                                                                                                                                                                             | <p><input type="checkbox"/> Yes <input type="checkbox"/> No</p> <p><input type="checkbox"/> Yes <input type="checkbox"/> No</p>                                                        |
| <p>Muscle contractions or spasms</p>                                                                                                                                                                                                                                                                                                                      | <p><input type="checkbox"/> Yes <input type="checkbox"/> No</p>                                                                                                                        |
| <p>Sudden fall to the ground (drop attack)</p>                                                                                                                                                                                                                                                                                                            | <p><input type="checkbox"/> Yes <input type="checkbox"/> No</p>                                                                                                                        |
| <p>Headache</p>                                                                                                                                                                                                                                                                                                                                           | <p><input type="checkbox"/> Yes <input type="checkbox"/> No</p>                                                                                                                        |
| <p>Nausea and/or vomiting</p>                                                                                                                                                                                                                                                                                                                             | <p><input type="checkbox"/> Yes <input type="checkbox"/> No</p>                                                                                                                        |
| <p>Pain or tightness on the chest</p>                                                                                                                                                                                                                                                                                                                     | <p><input type="checkbox"/> Yes <input type="checkbox"/> No</p>                                                                                                                        |
| <p>Shortness of breath</p>                                                                                                                                                                                                                                                                                                                                | <p><input type="checkbox"/> Yes <input type="checkbox"/> No</p>                                                                                                                        |
| <p>Palpitations, irregular heartbeat</p>                                                                                                                                                                                                                                                                                                                  | <p><input type="checkbox"/> Yes <input type="checkbox"/> No</p>                                                                                                                        |
| <p>Other relevant symptoms?</p> <p>_____</p> <p>_____</p> <p>_____</p> <p>_____</p>                                                                                                                                                                                                                                                                       | <p><input type="checkbox"/> Yes <input type="checkbox"/> No</p>                                                                                                                        |

## Questions regarding time delay

### *Determining time delay*

- Onset of symptoms:

date

|  |  |   |  |  |   |  |  |  |  |
|--|--|---|--|--|---|--|--|--|--|
|  |  | - |  |  | - |  |  |  |  |
|--|--|---|--|--|---|--|--|--|--|

time

|  |  |   |  |  |   |
|--|--|---|--|--|---|
|  |  | : |  |  | h |
|--|--|---|--|--|---|

- Participant first reported symptoms to:

- ☐ Relative/friend
- ☐ Relative/friend with medical knowledge
- ☐ General Practitioner (GP)
- ☐ GP out of hours service
- ☐ Emergency Department (ED)

This was at:

date

|  |  |   |  |  |   |  |  |  |  |
|--|--|---|--|--|---|--|--|--|--|
|  |  | - |  |  | - |  |  |  |  |
|--|--|---|--|--|---|--|--|--|--|

time

|  |  |   |  |  |   |
|--|--|---|--|--|---|
|  |  | : |  |  | h |
|--|--|---|--|--|---|

- The first contact with a medical service was with:

- ☐ GP
- ☐ GP out of hours service
- ☐ ED

This was at:

date

|  |  |   |  |  |   |  |  |  |  |
|--|--|---|--|--|---|--|--|--|--|
|  |  | - |  |  | - |  |  |  |  |
|--|--|---|--|--|---|--|--|--|--|

time

|  |  |   |  |  |   |
|--|--|---|--|--|---|
|  |  | : |  |  | h |
|--|--|---|--|--|---|

- The moment the participant made an appointment with the GP (making the appointment)

was:

date

|  |  |   |  |  |   |  |  |  |  |
|--|--|---|--|--|---|--|--|--|--|
|  |  | - |  |  | - |  |  |  |  |
|--|--|---|--|--|---|--|--|--|--|

time

|  |  |   |  |  |   |
|--|--|---|--|--|---|
|  |  | : |  |  | h |
|--|--|---|--|--|---|

### ***Factors that might influence delay***

- Living situation?
  - ☐ Alone
  - ☐ With partner/relatives
  - ☐ In a nursing home
  
- Highest level of education (*the original version includes Dutch levels of education*):
  - ☐ Primary education
  - ☐ Lower secondary education
  - ☐ Upper secondary education
  - ☐ Post-secondary non-tertiary education
  - ☐ Tertiary education
  - ☐ Other, namely: \_\_\_\_\_

---
  
- At the time of symptom onset, was the participant alone or in company of others?
  - ☐ Alone
  - ☐ In company of: \_\_\_\_\_
  
- Did the participant have an idea what caused the symptoms?
  - ☐ No
  - ☐ Yes, namely: \_\_\_\_\_

---
  
- How severe did the participant consider these symptoms were?  
On a scale of 0-10: 

|  |  |
|--|--|
|  |  |
|--|--|
  
- Did the participant consider these symptoms to be an emergency?
  - ☐ No
  - ☐ Yes
  
- What was the participants' first response to symptoms?
  - ☐ Nothing specific because symptoms quickly resolved
  - ☐ Wait and see
  - ☐ Asked a relative or friend for advice
  - ☐ Self-treatment
  - ☐ Seeking medical attention
  - ☐ Other, namely: \_\_\_\_\_

---
  
- If a relative or friend was asked for advice, what was the advice?  
\_\_\_\_\_  
\_\_\_\_\_  
\_\_\_\_\_

- Did the participant contact a medical service within 1 hour from symptom onset?

☐ Yes

☐ No

If NO, why? ☐ Not applicable

☐ Symptoms resolved

☐ Thought that the symptoms would resolve

☐ Did not consider it severe enough

☐ Others said it could wait

☐ Unable because of the symptoms

☐ Transportation issues

☐ Because it happened outside office hours

☐ Other, namely: \_\_\_\_\_

\_\_\_\_\_  
\_\_\_\_\_

- Was the participant familiar with TIA (before this episode)?

☐ Yes

☐ No

If YES, what are signs and symptoms of a TIA?

☐ Doesn't know any

☐ The following: \_\_\_\_\_

\_\_\_\_\_  
\_\_\_\_\_  
\_\_\_\_\_

If YES; a TIA can be a precursor of a certain disease. What disease?

☐ Doesn't know

☐ Precursor of: \_\_\_\_\_

\_\_\_\_\_

- Did you think a TIA requires urgent medical treatment (within a day)?

☐ Yes

☐ No

☐ Doesn't know
